# Supplementary material for: RNA-Seq Analysis of an Antisense Sequence Optimized for Exon Skipping in Duchenne Patients Reveals No Off-Target Effect
Source: PubMed Central journal article supplement — Mol Ther Nucleic Acids. 2017 Dec 21;10:277–91. doi: 10.1016/j.omtn.2017.12.008 (PMC5785776; doi:10.1016/j.omtn.2017.12.008), 2017-12-21
Supplement: mmc1.pdf [file mmc1.pdf]

**OMTN, Volume 10**

## **Supplemental Information**

### **RNA-Seq Analysis of an Antisense Sequence**

#### **Optimized for Exon Skipping in Duchenne**

#### **Patients Reveals No Off-Target Effect**

**Claire Domenger, Marine Allais, Virginie François, Adrien Léger, Emilie Lecomte, Marie Montus, Laurent Servais, Thomas Voit, Philippe Moullier, Yann Audic, and Caroline Le Guiner**

**Table S1:** Raw reads data after mapping on the human genome.

| <b>Samples</b> | <b>Number of input reads</b> | <b>Average input read length</b> | <b>Uniquely mapped reads number</b> | <b>Uniquely mapped reads %</b> |
|----------------|------------------------------|----------------------------------|-------------------------------------|--------------------------------|
| MT_NT_1        | 77195401                     | 197                              | 68279964                            | 88.45%                         |
| MT_NT_2        | 74927455                     | 196                              | 70292542                            | 93.81%                         |
| MT_NT_3        | 76346921                     | 197                              | 69890600                            | 91.54%                         |
| MT_U7_1        | 77803902                     | 196                              | 70904842                            | 91.13%                         |
| MT_U7_2        | 75010698                     | 196                              | 70165223                            | 93.54%                         |
| MT_U7_3        | 84426161                     | 196                              | 79012958                            | 93.59%                         |
| HEP_NT_1       | 59522053                     | 196                              | 53843790                            | 90.46%                         |
| HEP_NT_2       | 73721154                     | 195                              | 67687077                            | 91.81%                         |
| HEP_NT_3       | 92869178                     | 196                              | 82104643                            | 88.41%                         |
| HEP_U7_1       | 77212823                     | 195                              | 67039545                            | 86.82%                         |
| HEP_U7_2       | 76094381                     | 196                              | 66281471                            | 87.10%                         |
| HEP_U7_3       | 78118817                     | 195                              | 71631495                            | 91.70%                         |

**Table S2:** Ratios obtained between *DMD* transcripts and U7-E53 RNA in human primary hepatocytes and myotubes. The RPKM values (reads per kilobase per million mapped reads) represent the number of uniquely mapped reads normalized by the transcript length.

| Samples  | RPKM values for <i>DMD</i> transcript | Mean RPKM for <i>DMD</i> transcript | RPKM values for U7-E53 RNA | Mean RPKM for U7-E53 RNA | Ratio <i>DMD</i> transcript/U7-E53 RNA |
|----------|---------------------------------------|-------------------------------------|----------------------------|--------------------------|----------------------------------------|
| HEP_NT_1 | 2.9                                   | 2.6                                 | 0.0                        | 0.0                      |                                        |
| HEP_NT_2 | 2.6                                   |                                     | 0.0                        |                          |                                        |
| HEP_NT_3 | 1.9                                   |                                     | 0.0                        |                          |                                        |
| HEP_U7_1 | 3,5                                   |                                     | 1.9                        | 1.3                      | 2.0                                    |
| HEP_U7_2 | 2.8                                   |                                     | 0.5                        |                          |                                        |
| HEP_U7_3 | 1.9                                   |                                     | 1.4                        |                          |                                        |
| MT_NT_1  | 28.4                                  | 28.3                                | 0.1                        | 0.1                      |                                        |
| MT_NT_2  | 32.7                                  |                                     | 0.1                        |                          |                                        |
| MT_NT_3  | 32.2                                  |                                     | 0.0                        |                          |                                        |
| MT_U7_1  | 14.9                                  |                                     | 5.9                        | 4.7                      | 6.0                                    |
| MT_U7_2  | 27.3                                  |                                     | 4.7                        |                          |                                        |
| MT_U7_3  | 34.4                                  |                                     | 3.5                        |                          |                                        |

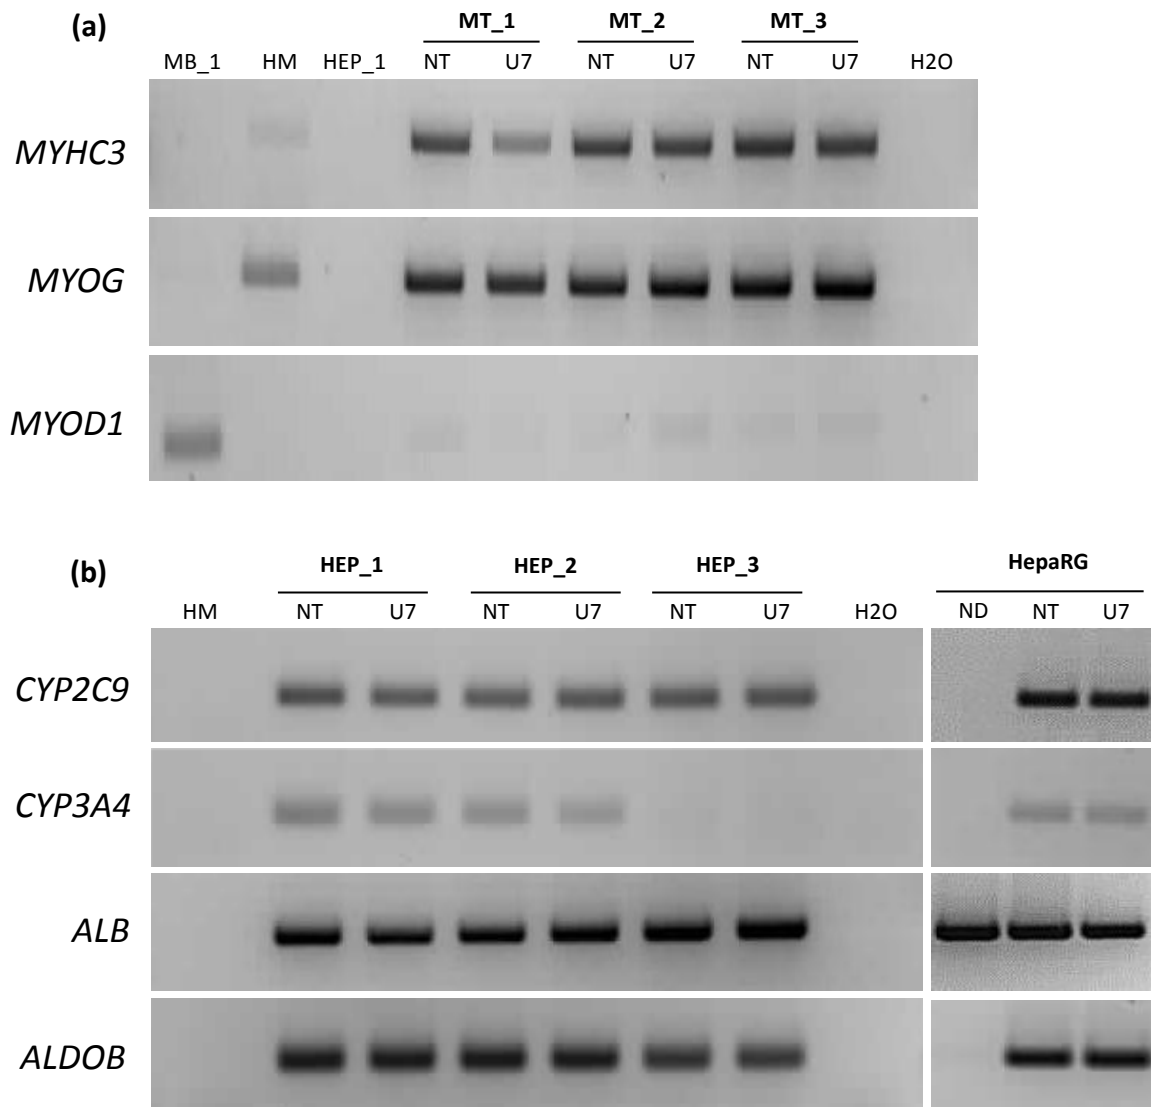

**Figure S1:** Confirmation of the muscular or hepatic transcriptomic pattern of human cellular models through RT-PCR on specific genes. **(a)** *MYHC3*, *MYOG*, and *MYOD1* expression analysis on one representative batch of human primary myoblasts (MB\_1), human skeletal muscle (HM), human primary hepatocytes (HEP\_1) and on 3 batches of different primary myotubes obtained from 3 different patients (MT\_1, 2, and 3) non-transduced (NT) or 3 days after transduction with rAAV3b-U7-E53 (U7). **(b)** *CYP2C9* and *CYP3A4*, *ALB* and *ALDOB* expression analysis on human skeletal muscle (HM), on 3 batches of different primary hepatocytes obtained from 3 different patients (HEP\_1, 2, and 3) non-transduced (NT) or transduced with rAAV3b-U7-E53 (U7) and on non-differentiated HepaRG (ND) and differentiated HepaRG non-transduced (NT) or transduced with rAAV3b-U7-E53 (U7). H2O: water.

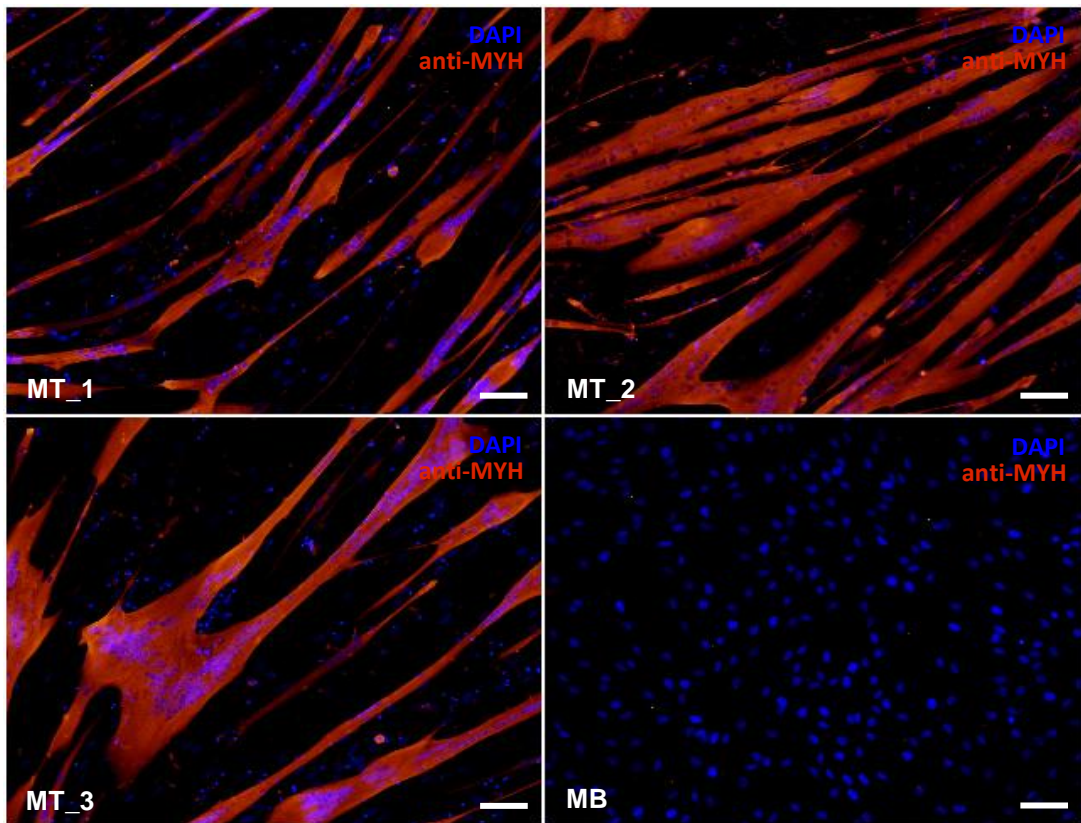

**Figure S2:** Analysis of the myosin heavy chain expression in human primary myotubes using immunostaining. Representative panels of 3 batches of different primary myotubes obtained from 3 different patients (MT\_1, 2, and 3) and one representative batch of human primary myoblasts (MB) stained with an anti-myosin antibody (red) and DAPI nuclear staining (blue). Scale bar = 100  $\mu$ m

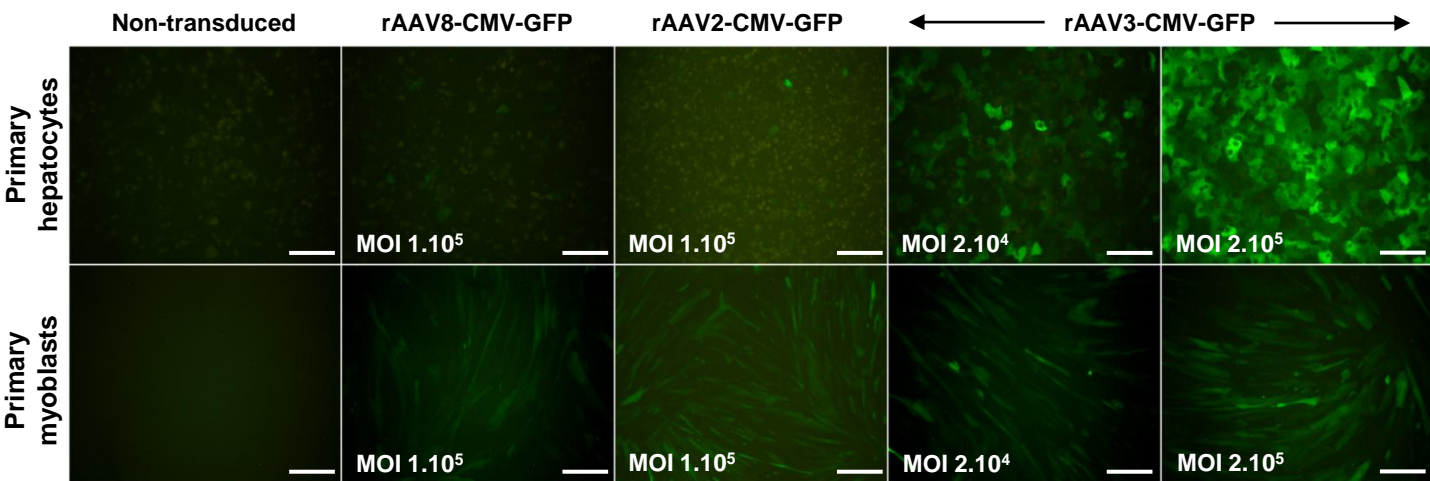

**Figure S3:** Representative examples of GFP expression after transduction of human primary hepatocytes and myoblasts with different serotypes of rAAV vectors encoding GFP under the control of the CMV promoter. Primary hepatocytes (upper) and myoblasts (lower) were transduced with rAAV8, rAAV2, or rAAV3b at different MOI. Cells were observed 3 days after transduction. Scale bar = 100  $\mu\text{m}$

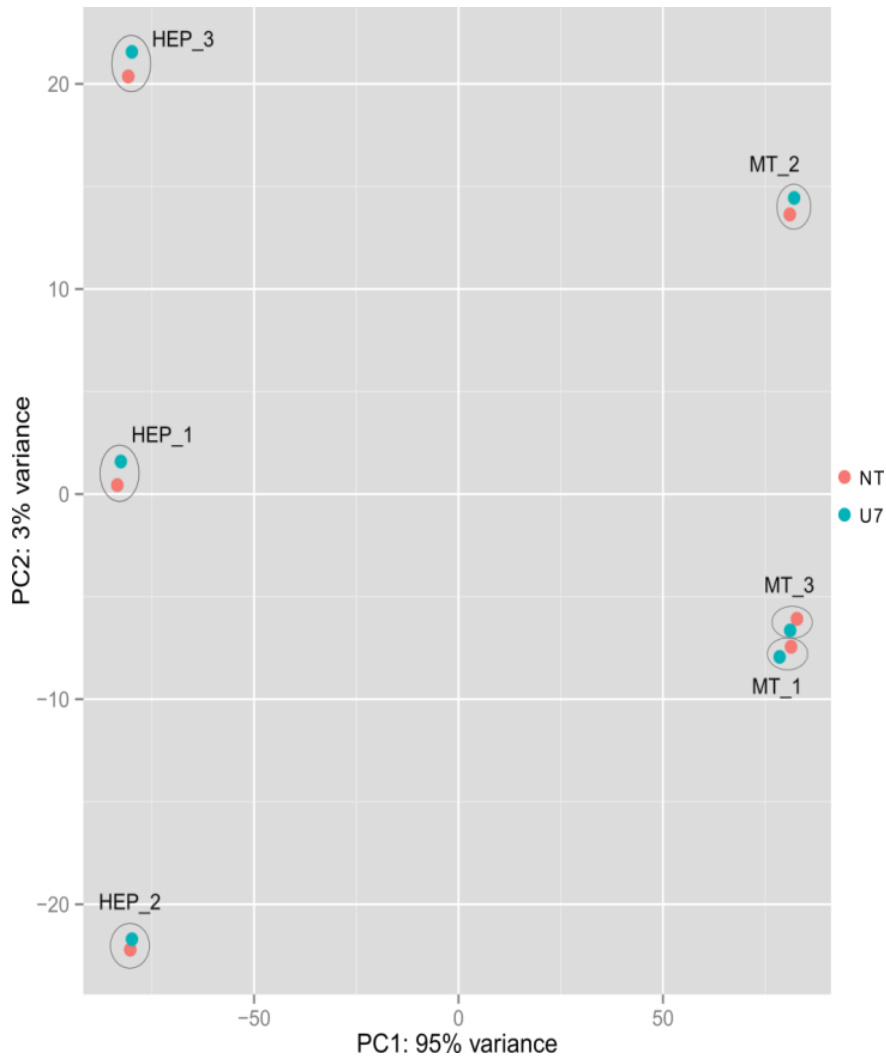

**Figure S4:** Graphic representation of principal component analyses (PCA) of raw expression data obtained from human primary myotubes and hepatocytes transduced or not with rAAV3b-U7-E53. Samples from the same patients are circled in gray.
